# Supplementary material for: Opening opportunities for Kd determination and screening of MHC peptide complexes
Source: PubMed Central journal article supplement (PMC9127112; doi:10.1038/s42003-022-03366-0), 2022-05-23
Supplement: 42003_2022_3366_MOESM2_ESM.pdf [file 42003_2022_3366_MOESM2_ESM.pdf]

## SUPPLEMENTARY INFORMATION

# Opening opportunities for $K_d$ determination and screening of MHC peptide complexes

Janine-Denise Kopicki<sup>1,2</sup>, Ankur Saikia<sup>3</sup>, Stephan Niebling<sup>4</sup>, Christian Günther<sup>4</sup>, Raghavendra Anjanappa<sup>3</sup>, Maria Garcia-Alai<sup>4</sup>, Sebastian Springer<sup>3\*</sup>, Charlotte Uetrecht<sup>1,2,5\*</sup>

<sup>1</sup>Centre for Structural Systems Biology (CSSB), Leibniz Institute of Virology (LIV), Notkestraße 85, 22607 Hamburg, Germany.

<sup>2</sup>University of Siegen, Am Eichenhang 50, 57076 Siegen, Germany.

<sup>3</sup>Life Sciences and Chemistry, Jacobs University, Campus Ring 1, 28759 Bremen, Germany.

<sup>4</sup>Centre for Structural Systems Biology (CSSB), European Molecular Biology Laboratory – Hamburg Outstation, Notkestraße 85, Hamburg 22607, Germany.

<sup>5</sup>European XFEL GmbH, Holzkoppel 4, 22869 Schenefeld, Germany

\* corresponding authors, email: charlotte.uetrecht@cssb-hamburg.de; s.springer@jacobs-university.de

*MHC class I, native MS, peptide binding, peptide affinity, iDSF, antigen presentation, erucamide*

### THIS PDF FILE INCLUDES:

**Figure S1.** Small molecule tandem MS analysis verifies that erucamide accounts for a large proportion of the contaminants found in dsA2 samples.

**Figure S2.** Raw spectrum of dsA2/NV9.

**Figure S3.** Melting temperature ( $T_m$ ) of dsA2 in presence of two corresponding truncated NV9 variants.

**Figure S4.** Overall area under the curve (AUC) for the detected dsA2 mass species at 25 V acceleration voltage.

**Figure S5.** Overall area under the curve (AUC) for the detected dsA2 mass species at 50 V acceleration voltage.

**Table S1.** Experimental masses and FWHM for dsA2 and different peptides obtained by native mass spectrometry.

**Table S2.** Overall area under the curve (AUC) for the detected dsA2 mass species at different acceleration voltages.

**Table S3.** Apparent dissociation constants ( $K_d$ ) for dsA2 and different peptides obtained by native MS and iDSF.

**Table S4.** Melting temperatures ( $T_m$ ) for dsA2 and different peptides obtained by nDSF.

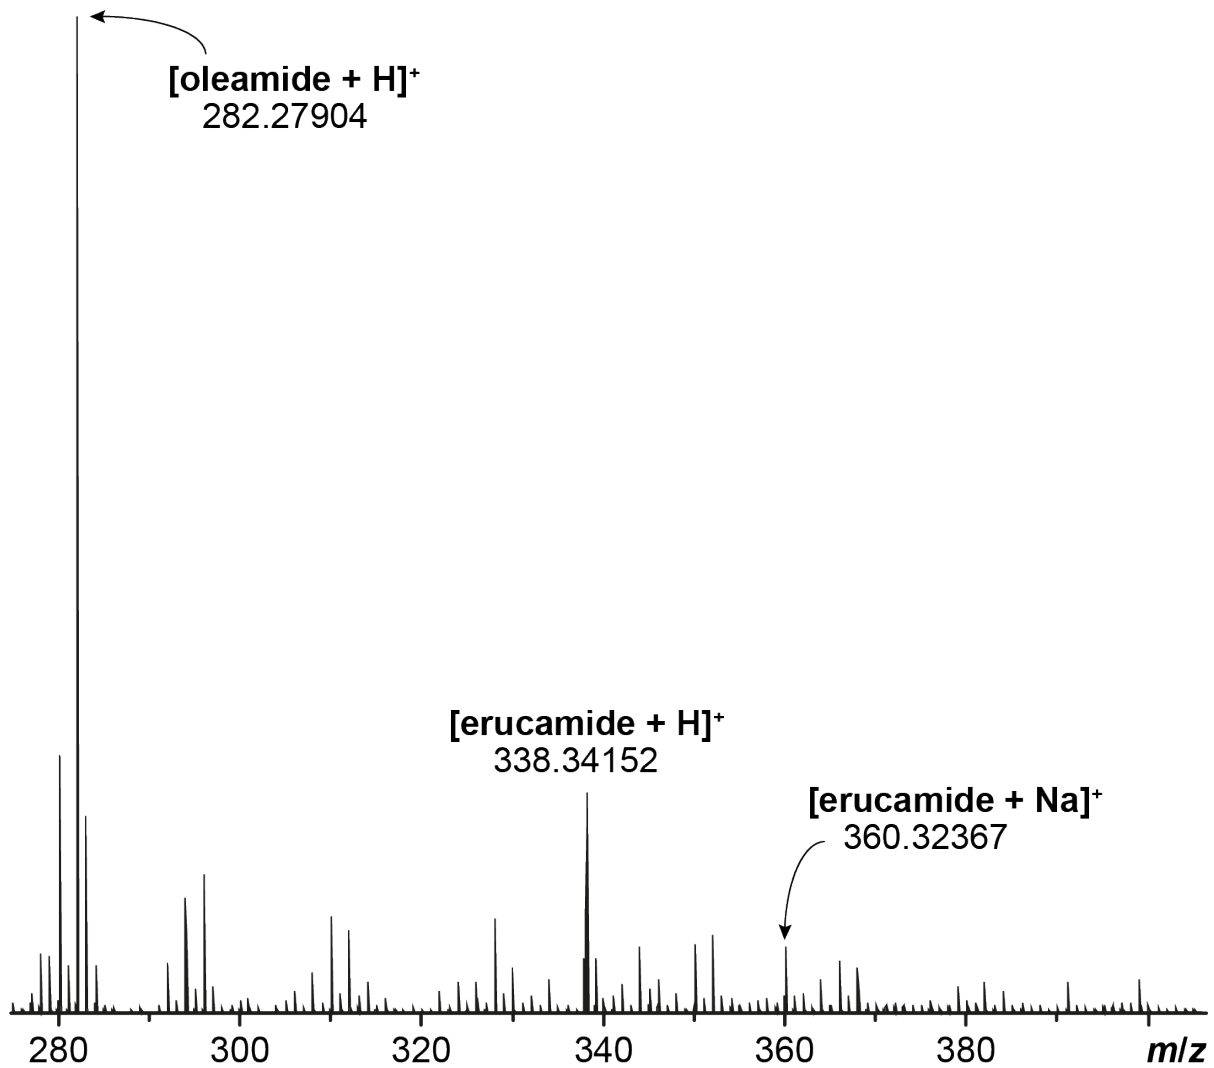

**Figure S1.** Small molecule tandem MS analysis verifies that erucamide accounts for a large proportion of the contaminants found in dsA2 samples. Displayed is a spectrum resulting from the subtraction of the spectrum of plastic ware contaminants (empty vial) from the one of the dsA2 sample itself. Erucamide (337 Da) is hereby identified as the contaminant adducted to dsA2. Although oleamide is also found in the sample, there was no evidence of binding to the protein in the native MS analysis, unlike for erucamide.



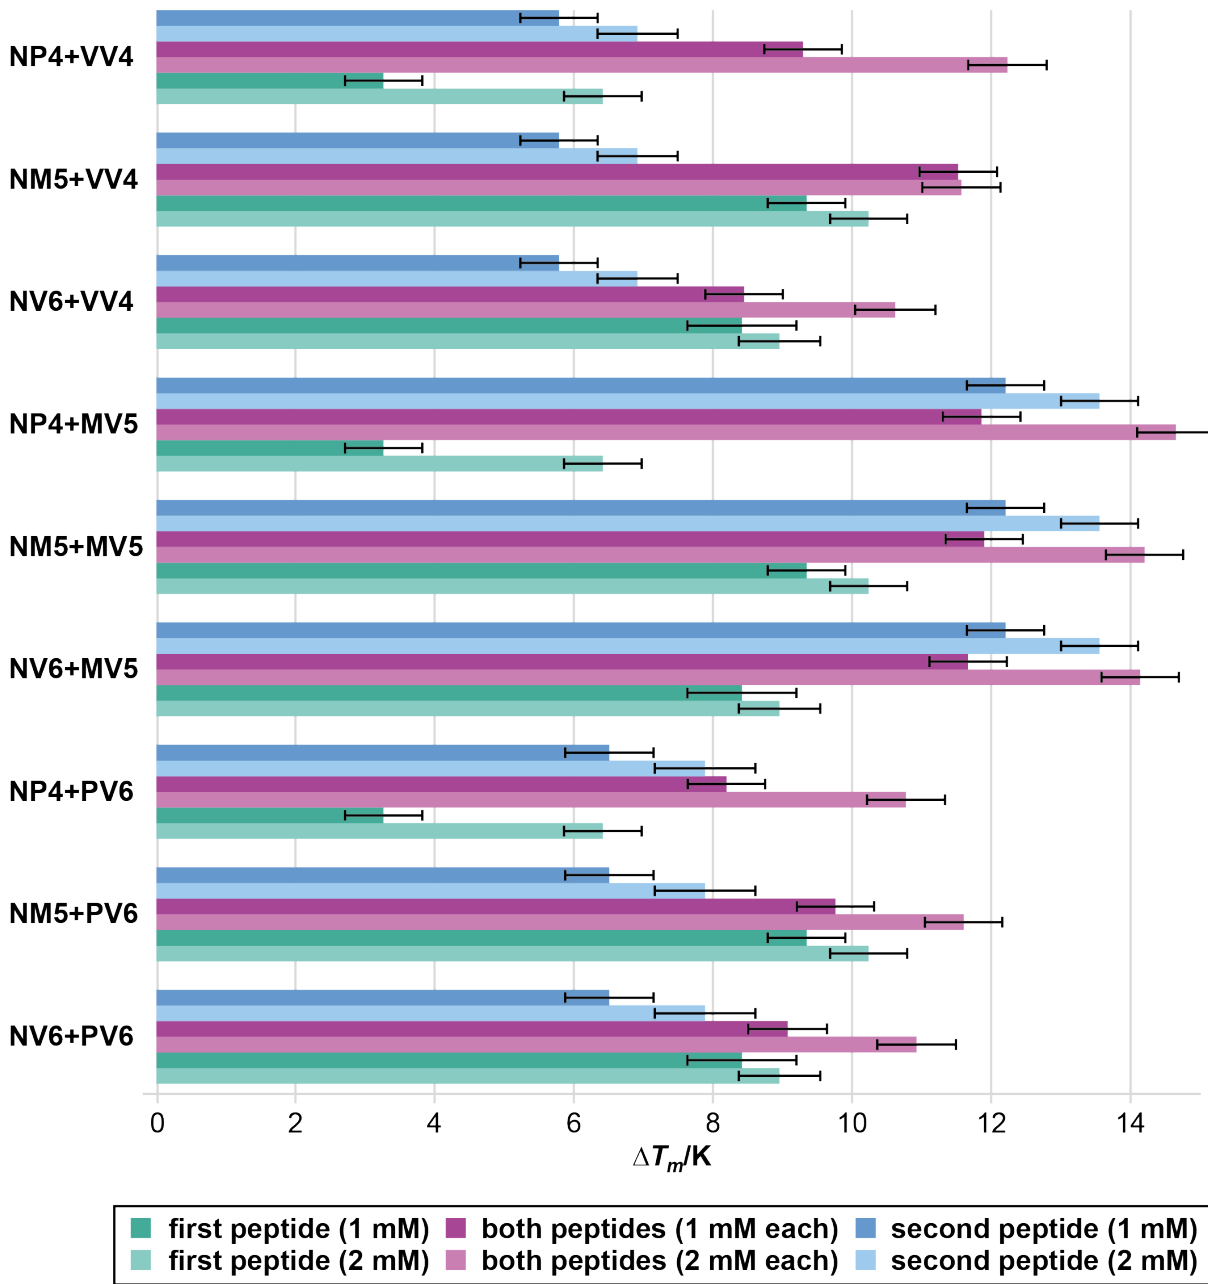

**Figure S3. Melting temperature ( $T_m$ ) of dsA2 in presence of two corresponding truncated NV9 variants.** Nanoscale differential scanning fluorimetry is employed to study thermal denaturation of dsA2 in presence of two peptides at once. 2  $\mu$ M dsA2 are combined with either exclusively the N- (teal) or C-terminal peptide (blue) or both peptides together (purple) at different concentrations. Results for  $\Delta T_m$  along with respective standard deviations are displayed.

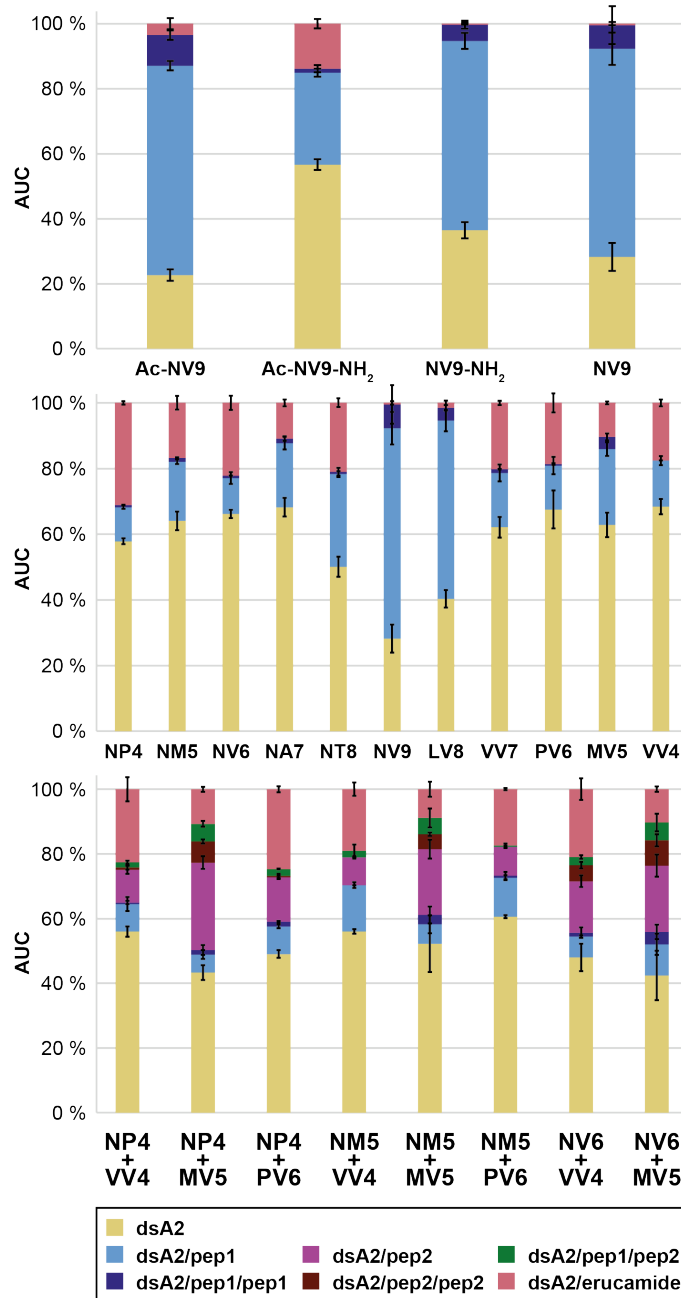

**Figure S4. Overall area under the curve (AUC) for the detected dsA2 mass species at 25 V acceleration voltage.** The AUC is determined over the entire spectrum for the respective mass species at 25 V. The mean value of the AUC in absence or presence of the different peptides (protein-peptide ratio 1:5, 1:10:10 in dual peptide approach) from at least three independent measurements is depicted along with error bars that represent the corresponding standard deviation. “dsA2” (yellow bars) corresponds to the empty HLA-A\*02:01(Y84C/A139C) disulfide mutant complex, “dsA2/pep” (light blue bars) to dsA2 bound to one peptide, “dsA2/pep/pep” to dsA2 bound to two molecules of this certain peptide (dark blue bars), “dsA2/pep2” to dsA2 bound to another peptide when two different peptides were present (purple bars), “dsA2/pep2/pep2” to dsA2 bound to two molecules of the second peptide (dark red bars), “dsA2/pep1/pep2” to dsA2 bound to one molecule of each of both peptides (dark green bars) and “dsA2/erucamide” to dsA2 bound to the erucamide (coral bars) respectively.

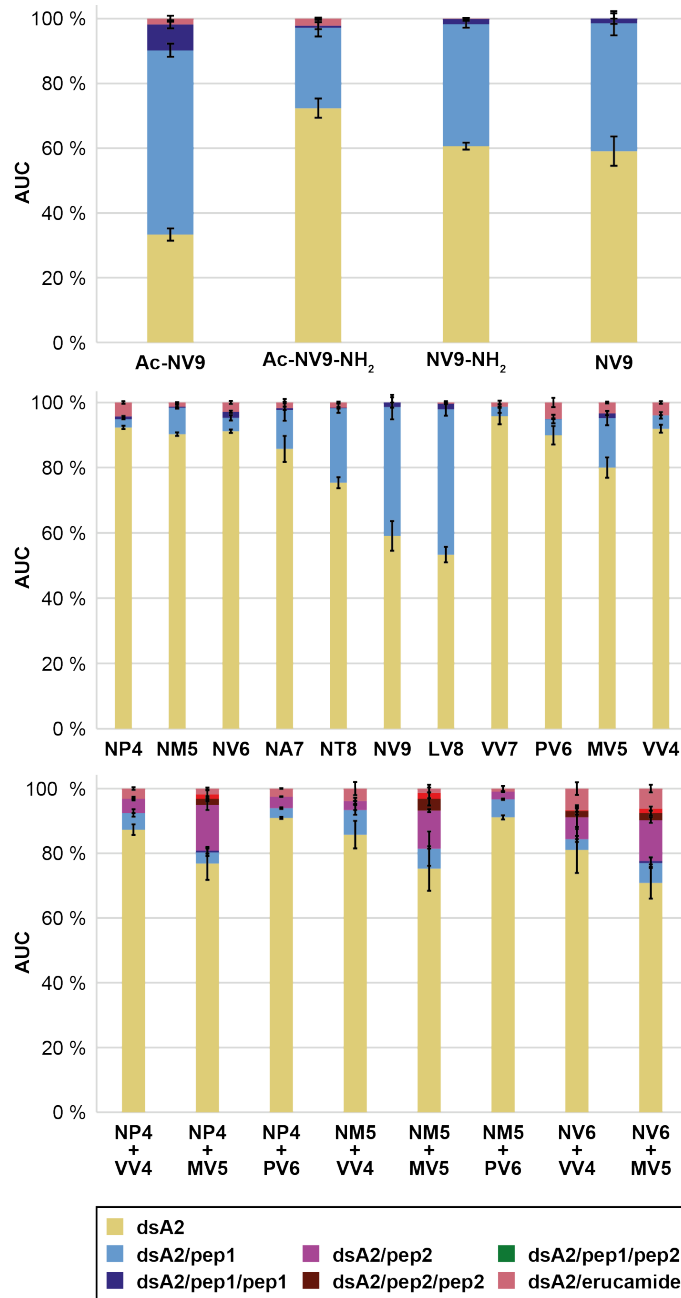

**Figure S5. Overall area under the curve (AUC) for the detected dsA2 mass species at 50 V acceleration voltage.** The AUC is determined over the entire spectrum for the respective mass species 50 V. The mean value of the AUC in absence or presence of the different peptides (protein-peptide ratio 1:5, 1:10:10 in dual peptide approach) from at least three independent measurements is depicted along with error bars that represent the corresponding standard deviation. “dsA2” (yellow bars) corresponds to the empty HLA-A\*02:01(Y84C/A139C) disulfide mutant complex, “dsA2/pep” (light blue bars) to dsA2 bound to one peptide, “dsA2/pep/pep” to dsA2 bound to two molecules of this certain peptide (dark blue bars), “dsA2/pep2” to dsA2 bound to another peptide when two different peptides were present (purple bars), “dsA2/pep2/pep2” to dsA2 bound to two molecules of the second peptide (dark red bars), “dsA2/pep1/pep2” to dsA2 bound to one molecule of each of both peptides (dark green bars) and “dsA2/erucamide” to dsA2 bound to the erucamide (coral bars) respectively.

**Table S1. Experimental masses and FWHM for dsA2 and different peptides obtained by native mass spectrometry.** Experimental masses ( $m_{\text{exp}}$ ) of the different protein species of disulfide stabilized HLA-A\*02:01(Y84C/A139C) disulfide mutant (dsA2) in absence or presence of the different peptides (protein-peptide ratio 1:5, 1:10:10 in dual peptide approach) are determined from at least three independent mass spectrometry measurements. They are listed together with the respective values for standard deviation  $s$  and average full width of the peak at half maximum (FWHM) along with the theoretically calculated molecular weight ( $M$ ). FWHM values are given for the whole peak area where individual species are not fully resolved. <sup>1</sup>NV9 – high affinity control, <sup>2</sup>YF9 – low affinity control, <sup>3</sup>GV9 – minimal binding motif, <sup>4</sup>Ac-NV9 – modified *N*-terminus, <sup>5</sup>Ac-NV9 NH<sub>2</sub> – modified *N*- and *C*-terminus, <sup>6</sup>NV9-NH<sub>2</sub> – modified *C*-terminus.

| mass species                             | $M/\text{Da}$ | $m_{\text{exp}}/\text{Da}$ | $s(m_{\text{exp}})/\text{Da}$ | FWHM/Da | $s(m_{\text{exp}})/\text{Da}$ |
|------------------------------------------|---------------|----------------------------|-------------------------------|---------|-------------------------------|
| dsA2 - M1                                | 43,608        | 43,603                     | 4                             | 20      | 20                            |
| dsA2                                     | 43,739        | 43,733                     | 4                             | 3       | 2                             |
| heavy chain (hc)                         | 31,877        | 31,873                     | 2                             | 2.1     | 0.3                           |
| $\beta_2\text{m}$ chain - M1             | 11,731        | 11,729                     | 2                             | 1.1     | 0.4                           |
| $\beta_2\text{m}$ chain                  | 11,862        | 11,860                     | 1                             | 1.4     | 0.2                           |
| dsA2/NV9 <sup>1</sup>                    | 44,682        | 44,678                     | 1                             | 3       | 2                             |
| dsA2/2×NV9                               | 45,625        | 45,624                     | 4                             | 12      | 6                             |
| hc/NV9                                   | 32,820        | 32,816.9                   | 0.8                           | 2.2     | 0.3                           |
| dsA2/YF9 <sup>2</sup>                    | 44,856        | 44,849                     | 1                             | 7       | 3                             |
| dsA2/GV9 <sup>3</sup>                    | 44,369        | 44,363.8                   | 0.7                           | 2       | 1                             |
| dsA2/2×GV9                               | 44,999        | 44,995                     | 2                             | 3       | 2                             |
| hc/GV9                                   | 32,507        | 32,503.0                   | 0.5                           | 2.08    | 0.09                          |
| dsA2/Ac-NV9 <sup>4</sup>                 | 44,724        | 44,718.3                   | 0.5                           | 1.6     | 0.3                           |
| dsA2/2×Ac-NV9                            | 45,709        | 45,704                     | 2                             | 3       | 2                             |
| hc/Ac-NV9                                | 32,862        | 32,857.3                   | 0.5                           | 1.9     | 0.1                           |
| dsA2/Ac-NV9-NH <sub>2</sub> <sup>5</sup> | 44,723        | 44,717.4                   | 1.0                           | 1.4     | 0.1                           |
| dsA2/2×Ac-NV9-NH <sub>2</sub>            | 45,707        | 45,701.00                  | 1.00                          | 1.8     | 0.6                           |
| hc/Ac-NV9-NH <sub>2</sub>                | 32,861        | 32,857.0                   | 0.9                           | 1.7     | 0.2                           |
| dsA2/NV9-NH <sub>2</sub> <sup>6</sup>    | 44,681        | 44,676.4                   | 0.5                           | 1.38    | 0.06                          |
| dsA2/2×NV9-NH <sub>2</sub>               | 45,623        | 45,619.6                   | 0.9                           | 1.6     | 0.6                           |
| hc/NV9-NH <sub>2</sub>                   | 32,819        | 32,815.1                   | 0.9                           | 1.72    | 0.10                          |

| mass species | $M/Da$ | $m_{exp}/Da$ | $s(m_{exp})/Da$ | FWHM/Da | $s(m_{exp})/Da$ |
|--------------|--------|--------------|-----------------|---------|-----------------|
| dsA2/NP4     | 44,181 | 44,176       | 3               | 10      | 10              |
| dsA2/2×NP4   | 44,623 | 44,619       | 4               | 30      | 40              |
| hc/NP4       | 32,319 | 32,317       | 2               | 20      | 40              |
| dsA2/NM5     | 44,312 | 44,309       | 2               | 6       | 3               |
| dsA2/2×NM5   | 44,885 | 44,883       | 2               | 60      | 50              |
| hc/NM5       | 32,450 | 32,449       | 1               | 2.5     | 0.6             |
| dsA2/NV6     | 44,411 | 44411        | 1               | 7       | 2               |
| dsA2/2×NV6   | 45,083 | 45,082       | 3               | 145     | 6               |
| hc/NV6       | 32,549 | 32,547       | 3               | 6       | 7               |
| dsA2/NA7     | 44,481 | 44,476.4     | 0.5             | 5       | 3               |
| dsA2/2×NA7   | 45,223 | 45,225       | 4               | 30      | 60              |
| hc/NA7       | 32,619 | 32,615       | 2               | 2.4     | 0.5             |
| dsA2/NT8     | 44,583 | 44,579.33    | 1.00            | 3       | 2               |
| dsA2/2×NT8   | 45,427 | 45,425       | 2               | 7       | 5               |
| hc/NT8       | 32,721 | 32,718.1     | 0.3             | 2.4     | 0.7             |
| dsA2/LV8     | 44,568 | 44,565.8     | 0.7             | 2.6     | 0.7             |
| dsA2/2×LV8   | 45,397 | 45,396.1     | 0.3             | 3.4     | 1.0             |
| hc/LV8       | 32,706 | 32,704.8     | 0.4             | 2.18    | 0.04            |
| dsA2/VV7     | 44,455 | 44,447.8     | 0.8             | 7       | 3               |
| dsA2/2×VV7   | 45,171 | 45,166       | 3               | 3       | 1               |
| hc/VV7       | 32,593 | 32,586       | 3               | 3       | 2               |
| dsA2/PV6     | 44,356 | 44,350       | 3               | 5       | 3               |
| dsA2/2×PV6   | 44,973 | 44969        | 4               | 100     | 50              |
| hc/PV6       | 32,194 | 32,487       | 3               | 2.3     | 0.4             |
| dsA2/MV5     | 44,259 | 44,254       | 3               | 8       | 12              |
| dsA2/2×MV5   | 44,779 | 44,774       | 4               | 20      | 30              |



| mass species   | $M/Da$ | $m_{exp}/Da$ | $s(m_{exp})/Da$ | FWHM/Da | $s(m_{exp})/Da$ |
|----------------|--------|--------------|-----------------|---------|-----------------|
| hc/MV5         | 32,397 | 32,388.4     | 1.0             | 2.1     | 0.2             |
| dsA2/VV4       | 44,127 | 44,125       | 5               | 10      | 10              |
| dsA2/2×VV4     | 44,515 | 44,512       | 8               | 20      | 30              |
| hc/VV4         | 32,265 | 32,255       | 1               | 10      | 3               |
| dsA2/erucamide | 44,077 | 44,071       | 5               | 10      | 20              |
| dsA2/NP4/VV4   | 44,569 | 44,565       | 2               | 30      | 40              |
| dsA2/NP4/MV5   | 44,701 | 44,697       | 2               | 4       | 5               |
| dsA2/NP4/PV6   | 44,798 | 44,792       | 3               | 7       | 6               |
| dsA2/NM5/VV4   | 44,700 | 44,699       | 2               | 30      | 40              |
| dsA2/NM5/MV5   | 44,832 | 44,827       | 2               | 12      | 3               |
| dsA2/NM5/PV6   | 44,929 | 44,927       | 2               | 100     | 40              |
| dsA2/NV6/VV4   | 44,799 | 44,797       | 4               | 30      | 40              |
| dsA2/NV6/MV5   | 45,451 | 44,927       | 5               | 100     | 60              |

**Table S2. Overall area under the curve (AUC) for the detected dsA2 mass species at different acceleration voltages.** The AUC is determined over the entire spectrum for the respective mass species at 10 V, 25 V and 50 V. The mean value of the AUC in absence or presence of the different peptides (protein-peptide ratio 1:5, 1:10:10 in dual peptide approach) from at least three independent measurements is listed together with their corresponding standard deviation *s*. “dsA2” corresponds to the empty HLA-A\*02:01(Y84C/A139C) disulfide mutant complex, “dsA2/pep” to dsA2 bound to one peptide, “dsA2/pep/pep” to dsA2 bound to two molecules of this certain peptide, “dsA2/pep2” to dsA2 bound to another peptide when two different peptides were present, “dsA2/pep2/pep2” to dsA2 bound to two molecules of the second peptide, “dsA2/pep1/pep2” to dsA2 bound to one molecule of each of both peptides and “dsA2/erucamide” to dsA2 bound to the erucamide respectively. <sup>1</sup>NV9 – high affinity control, <sup>2</sup>YF9 – low affinity control, <sup>3</sup>GV9 – minimal binding motif, <sup>4</sup>Ac-NV9 – modified *N*-terminus, <sup>5</sup>Ac-NV9 NH2 – modified *N*- and *C*-terminus, <sup>6</sup>NV9-NH2 – modified *C*-terminus.

| peptide                 | acc. volt. | dsA2 |          | dsA2/pep |          | dsA2/pep/pep |          | dsA2/pep2 |          | dsA2/pep2/pep2 |          | dsA2/pep1/pep2 |          | dsA2/erucamide |          |
|-------------------------|------------|------|----------|----------|----------|--------------|----------|-----------|----------|----------------|----------|----------------|----------|----------------|----------|
|                         |            | AUC  | <i>s</i> | AUC      | <i>s</i> | AUC          | <i>s</i> | AUC       | <i>s</i> | AUC            | <i>s</i> | AUC            | <i>s</i> | AUC            | <i>s</i> |
| NV9 <sup>1</sup>        | 10 V       | 31%  | 2%       | 64%      | 3%       | 4%           | 4%       |           |          |                |          |                |          | 2%             | 2%       |
|                         | 25 V       | 28%  | 4%       | 64%      | 5%       | 7%           | 6%       |           |          |                |          |                |          | 0.5%           | 0.5%     |
|                         | 50 V       | 59%  | 5%       | 40%      | 4%       | 1%           | 2%       |           |          |                |          |                |          | 0%             | 0%       |
| YF9 <sup>2</sup>        | 10 V       | 56%  | 3%       | 4%       | 2%       | 0%           | 0%       |           |          |                |          |                |          | 39%            | 2%       |
|                         | 25 V       | 51%  | 4%       | 5%       | 2%       | 0%           | 0%       |           |          |                |          |                |          | 44%            | 3%       |
|                         | 50 V       | 95%  | 5%       | 5%       | 2%       | 0%           | 0%       |           |          |                |          |                |          | 2%             | 2%       |
| GV9 <sup>3</sup>        | 10 V       | 52%  | 2%       | 43%      | 2%       | 1.5%         | 0.4%     |           |          |                |          |                |          | 4.3%           | 0.6%     |
|                         | 25 V       | 50%  | 1%       | 43%      | 3%       | 2.2%         | 0.9%     |           |          |                |          |                |          | 5%             | 2%       |
|                         | 50 V       | 62%  | 3%       | 35%      | 3%       | 1.1%         | 0.3%     |           |          |                |          |                |          | 1.7%           | 0.2%     |
| Ac-NV9 <sup>4</sup>     | 10 V       | 24%  | 2%       | 63%      | 3%       | 11%          | 2%       |           |          |                |          |                |          | 2.1%           | 0.5%     |
|                         | 25 V       | 23%  | 2%       | 64%      | 1%       | 9%           | 1%       |           |          |                |          |                |          | 3%             | 2%       |
|                         | 50 V       | 33%  | 2%       | 57%      | 2%       | 8%           | 1%       |           |          |                |          |                |          | 1.7%           | 0.9%     |
| Ac-NV9-NH2 <sup>5</sup> | 10 V       | 55%  | 2%       | 27.9%    | 0.5%     | 2.4%         | 0.6%     |           |          |                |          |                |          | 15%            | 1%       |
|                         | 25 V       | 57%  | 2%       | 28%      | 1%       | 1%           | 1%       |           |          |                |          |                |          | 14%            | 1%       |
|                         | 50 V       | 72%  | 3%       | 25%      | 3%       | 1%           | 1%       |           |          |                |          |                |          | 2.2%           | 0.4%     |
| NV9-NH2 <sup>6</sup>    | 10 V       | 36%  | 2%       | 59%      | 2%       | 5%           | 1%       |           |          |                |          |                |          | 0.4%           | 0.2%     |
|                         | 25 V       | 36%  | 2%       | 58%      | 2%       | 5%           | 1%       |           |          |                |          |                |          | 0.3%           | 0.3%     |
|                         | 50 V       | 61%  | 1%       | 38%      | 1%       | 1.6%         | 0.3%     |           |          |                |          |                |          | 0.1%           | 0.2%     |

| peptide | acc. volt. | dsA2  |      | dsA2/pep |      | dsA2/pep/pep |       | dsA2/pep2 |   | dsA2/pep2/pep2 |   | dsA2/pep1/pep2 |   | dsA2/erucamide |      |
|---------|------------|-------|------|----------|------|--------------|-------|-----------|---|----------------|---|----------------|---|----------------|------|
|         |            | AUC   | s    | AUC      | s    | AUC          | s     | AUC       | s | AUC            | s | AUC            | s | AUC            | s    |
| NP4     | 10 V       | 55%   | 2%   | 11%      | 1%   | 0.6%         | 0.2%  |           |   |                |   |                |   | 33.8%          | 0.6% |
|         | 25 V       | 57.8% | 0.9% | 10.4%    | 0.5% | 0.69%        | 0.06% |           |   |                |   |                |   | 31.1%          | 0.5% |
|         | 50 V       | 92.4% | 0.5% | 2.6%     | 0.1% | 0.8%         | 0.1%  |           |   |                |   |                |   | 4.3%           | 0.3% |
| NM5     | 10 V       | 62%   | 2%   | 17.9%    | 0.6% | 1.0%         | 0.2%  |           |   |                |   |                |   | 19%            | 1%   |
|         | 25 V       | 64%   | 3%   | 18.0%    | 0.7% | 1.2%         | 0.2%  |           |   |                |   |                |   | 17%            | 2%   |
|         | 50 V       | 90.3% | 0.6% | 8.1%     | 0.3% | 0.3%         | 0.6%  |           |   |                |   |                |   | 1.3%           | 0.1% |
| NV6     | 10 V       | 66%   | 1%   | 10%      | 2%   | 0.5%         | 0.1%  |           |   |                |   |                |   | 24%            | 1%   |
|         | 25 V       | 66%   | 1%   | 11%      | 2%   | 0.69%        | 0.08% |           |   |                |   |                |   | 22%            | 2%   |
|         | 50 V       | 91.2% | 0.5% | 4.1%     | 0.8% | 1.9%         | 0.3%  |           |   |                |   |                |   | 2.9%           | 0.4% |
| NA7     | 10 V       | 75%   | 3%   | 16%      | 2%   | 0.8%         | 0.3%  |           |   |                |   |                |   | 8%             | 1%   |
|         | 25 V       | 68%   | 3%   | 19%      | 2%   | 1.4%         | 0.7%  |           |   |                |   |                |   | 11%            | 1%   |
|         | 50 V       | 86%   | 4%   | 12%      | 3%   | 0.5%         | 0.5%  |           |   |                |   |                |   | 1.8%           | 0.2% |
| NT8     | 10 V       | 47.3% | 0.9% | 28%      | 1%   | 0.6%         | 0.5%  |           |   |                |   |                |   | 24%            | 1%   |
|         | 25 V       | 50%   | 3%   | 28.2%    | 0.9% | 1%           | 1%    |           |   |                |   |                |   | 21%            | 1%   |
|         | 50 V       | 75%   | 2%   | 23%      | 1%   | 0.2%         | 0.3%  |           |   |                |   |                |   | 1.6%           | 0.3% |
| LV8     | 10 V       | 42%   | 6%   | 54%      | 5%   | 2.8%         | 0.3%  |           |   |                |   |                |   | 1.7%           | 0.9% |
|         | 25 V       | 40%   | 3%   | 54%      | 3%   | 3.9%         | 0.8%  |           |   |                |   |                |   | 1.5%           | 0.7% |
|         | 50 V       | 53%   | 2%   | 45%      | 2%   | 1.6%         | 0.2%  |           |   |                |   |                |   | 0.4%           | 0.4% |
| VV7     | 10 V       | 61.8% | 0.5% | 17%      | 2%   | 1.7%         | 0.3%  |           |   |                |   |                |   | 19%            | 3%   |
|         | 25 V       | 62%   | 3%   | 17%      | 3%   | 1.16%        | 0.06% |           |   |                |   |                |   | 20.2%          | 0.7% |
|         | 50 V       | 96%   | 3%   | 3%       | 2%   | 0%           | 0%    |           |   |                |   |                |   | 1.3%           | 0.6% |
| PV6     | 10 V       | 68%   | 6%   | 12%      | 2%   | 0.5%         | 0.6%  |           |   |                |   |                |   | 19%            | 3%   |
|         | 25 V       | 68%   | 6%   | 13%      | 3%   | 0.5%         | 0.2%  |           |   |                |   |                |   | 19%            | 3%   |
|         | 50 V       | 90%   | 3%   | 5%       | 1%   | 0.1%         | 0.1%  |           |   |                |   |                |   | 5%             | 1%   |

| peptide   | acc. volt. | dsA2  |      | dsA2/pep |      | dsA2/pep/pep |      | dsA2/pep2 |      | dsA2/pep2/pep2 |      | dsA2/pep1/pep2 |      | dsA2/erucamide |        |
|-----------|------------|-------|------|----------|------|--------------|------|-----------|------|----------------|------|----------------|------|----------------|--------|
|           |            | AUC   | s    | AUC      | s    | AUC          | s    | AUC       | s    | AUC            | s    | AUC            | s    | AUC            | s      |
| MV5       | 10 V       | 64%   | 3%   | 23%      | 2%   | 3.2%         | 0.7% |           |      |                |      |                |      | 10.4%          | 0.2%   |
|           | 25 V       | 63%   | 4%   | 23%      | 2%   | 3.7%         | 1.0% |           |      |                |      |                |      | 10.4%          | 0.4%   |
|           | 50 V       | 80%   | 3%   | 15%      | 2%   | 1.5%         | 0.6% |           |      |                |      |                |      | 3.3%           | 0.3%   |
| VV4       | 10 V       | 68%   | 1%   | 14%      | 1%   | 0%           | 0%   |           |      |                |      |                |      | 18.093%        | 0.007% |
|           | 25 V       | 68%   | 2%   | 14%      | 1%   | 0%           | 0%   |           |      |                |      |                |      | 17.6%          | 1.0%   |
|           | 50 V       | 92%   | 1%   | 4.1%     | 1.0% | 0%           | 0%   |           |      |                |      |                |      | 4.0%           | 0.4%   |
| NP4 + VV4 | 10 V       | 54%   | 2%   | 9%       | 3%   | 1.1%         | 0.5% | 10%       | 1%   | 1.2%           | 1.0% | 2.1%           | 0.5% | 22%            | 4%     |
|           | 25 V       | 56%   | 2%   | 8%       | 2%   | 0.5%         | 0.5% | 10%       | 1%   | 0.7%           | 0.7% | 1.6%           | 0.5% | 22%            | 4%     |
|           | 50 V       | 87%   | 2%   | 5%       | 1%   | 0%           | 0%   | 4.4%      | 0.6% | 0%             | 0%   | 0%             | 0%   | 3.1%           | 0.4%   |
| NP4 + MV5 | 10 V       | 42.9% | 0.9% | 6%       | 2%   | 1.8%         | 0.3% | 27%       | 1%   | 5.6%           | 0.3% | 5.2%           | 0.8% | 10%            | 1%     |
|           | 25 V       | 43%   | 2%   | 5%       | 1%   | 1%           | 2%   | 27%       | 2%   | 6.4%           | 0.6% | 5.3%           | 0.9% | 10.5%          | 0.8%   |
|           | 50 V       | 76%   | 5%   | 3%       | 1%   | 0.5%         | 0.9% | 14%       | 2%   | 1.9%           | 0.8% | 1%             | 1%   | 1.8%           | 0.3%   |
| NP4 + PV6 | 10 V       | 48%   | 3%   | 8%       | 1%   | 1.7%         | 0.3% | 13%       | 2%   | 0.9%           | 0.8% | 2.8%           | 0.2% | 25%            | 2%     |
|           | 25 V       | 49%   | 1%   | 8.5%     | 0.6% | 1.4%         | 0.2% | 13.6%     | 0.5% | 0.4%           | 0.7% | 2.1%           | 0.1% | 24.5%          | 0.9%   |
|           | 50 V       | 90.8% | 0.3% | 3.0%     | 0.3% | 0%           | 0%   | 3.5%      | 0.1% | 0%             | 0%   | 0%             | 0%   | 2.5%           | 0.1%   |
| NM5 + VV4 | 10 V       | 56%   | 3%   | 13%      | 2%   | 1%           | 1%   | 8.9%      | 0.8% | 0.5%           | 0.8% | 1.8%           | 1.6% | 18%            | 4%     |
|           | 25 V       | 55.7% | 0.7% | 14.2%    | 0.9% | 0%           | 0%   | 8.6%      | 0.4% | 0%             | 0%   | 2.0%           | 1.9% | 19%            | 2%     |
|           | 50 V       | 86%   | 4%   | 8%       | 1%   | 0%           | 0%   | 2.8%      | 1.0% | 0%             | 0%   | 0%             | 0%   | 4%             | 2%     |
| NM5 + MV5 | 10 V       | 46%   | 7%   | 8%       | 3%   | 5%           | 4%   | 20%       | 1%   | 4.9%           | 0.8% | 6%             | 1%   | 9%             | 1%     |
|           | 25 V       | 51%   | 9%   | 6%       | 3%   | 3%           | 3%   | 20%       | 3%   | 4.5%           | 0.5% | 5%             | 3%   | 9%             | 2%     |
|           | 50 V       | 75%   | 7%   | 6%       | 5%   | 0%           | 0%   | 11.7%     | 0.4% | 4%             | 2%   | 2%             | 2%   | 1%             | 1%     |
| NM5 + PV6 | 10 V       | 58%   | 2%   | 11.9%    | 0.6% | 1%           | 2%   | 9%        | 2%   | 0%             | 0%   | 0.4%           | 0.7% | 18%            | 1%     |
|           | 25 V       | 60.3% | 0.5% | 12.0%    | 0.8% | 1%           | 1%   | 8.9%      | 0.4% | 0%             | 0%   | 0.4%           | 0.7% | 17.3%          | 0.4%   |
|           | 50 V       | 91.1% | 0.7% | 5.6%     | 0.2% | 0%           | 0%   | 2.4%      | 0.2% | 0%             | 0%   | 0%             | 0%   | 0.9%           | 0.8%   |

| peptide         | acc.<br>volt. | dsA2 |    | dsA2/pep |    | dsA2/pep/pep |    | dsA2/pep2 |      | dsA2/pep2/pep2 |      | dsA2/pep1/pep2 |      | dsA2/erucamide |      |
|-----------------|---------------|------|----|----------|----|--------------|----|-----------|------|----------------|------|----------------|------|----------------|------|
|                 |               | AUC  | s  | AUC      | s  | AUC          | s  | AUC       | s    | AUC            | s    | AUC            | s    | AUC            | s    |
| NV6<br>+<br>VV4 | 10 V          | 47%  | 8% | 6%       | 1% | 1%           | 0% | 17%       | 4%   | 7%             | 4%   | 3%             | 0%   | 18%            | 1%   |
|                 | 25 V          | 48%  | 4% | 6%       | 0% | 1%           | 2% | 16%       | 2%   | 5%             | 1%   | 2%             | 1%   | 21%            | 3%   |
|                 | 50 V          | 81%  | 7% | 3%       | 1% | 0%           | 0% | 7%        | 4%   | 2%             | 1%   | 0%             | 0%   | 7%             | 2%   |
| NV6<br>+<br>MV5 | 10 V          | 47%  | 5% | 8%       | 2% | 4%           | 2% | 21%       | 1%   | 6.5%           | 0.8% | 3.0%           | 0.3% | 10%            | 2%   |
|                 | 25 V          | 42%  | 8% | 9%       | 3% | 4%           | 2% | 20%       | 3%   | 8%             | 2%   | 5%             | 3%   | 10.2%          | 0.8% |
|                 | 50 V          | 71%  | 5% | 6%       | 2% | 1%           | 1% | 12.5%     | 0.9% | 2.1%           | 0.7% | 1.4%           | 0.6% | 6%             | 1%   |

**Table S3. Apparent dissociation constants ( $K_d$ ) for dsA2 and different peptides obtained by native MS and iDSF.** The  $K_d$  is calculated from the respective area under the curve values at 10 V acceleration voltage (protein-peptide ratio 1:5).  $K_{d,high}$  is an affinity determined on the basis of a real experiment at a cone voltage of 150 V, while a theoretical cone voltage of 36 V is assumed for  $K_{d,low}$  to correct for ion-source decay.  $K_{d,iDSF}$  is derived by two independent measurements. Protein concentration is 2.2  $\mu$ M. For each ligand, a two-fold serial dilution series is prepared using 11 concentrations depending on their predicted or assumed  $K_d$  range. The listed standard deviation  $s$  for  $K_d$  is determined using common equations, which estimate the propagation of uncertainty. <sup>1</sup>NV9 – high affinity control, <sup>2</sup>GV9 – minimal binding motif, <sup>3</sup>Ac-NV9 – modified *N*-terminus, <sup>4</sup>Ac-NV9 NH2 – modified *N*- and *C*-terminus, <sup>5</sup>NV9-NH2 – modified *C*-terminus; \*iDSF reaches its limits at affinities below 200 nm, hence the values of grayed-out peptides are not reliable.

| peptide                 | sequence  | $K_{d,high}$ |           | $K_{d,low}$ |           | $K_{d,iDSF}$ |           |
|-------------------------|-----------|--------------|-----------|-------------|-----------|--------------|-----------|
|                         |           | $K_d/\mu$ M  | $s/\mu$ M | $K_d/\mu$ M | $s/\mu$ M | $K_d/\mu$ M  | $s/\mu$ M |
| NV9 <sup>1</sup>        | NLVPMVATV | 8            | 2         | 0.06        | 0.08      | 0.04*        | 0.01      |
| GV9 <sup>2</sup>        | GLGGGGGGV | 35           | 2         | 0.5         | 0.2       | 0.36         | 0.06      |
| Ac-NV9 <sup>3</sup>     |           | 4.5          | 1.0       | 0.11        | 0.05      | 0.61         | 0.08      |
| Ac-NV9-NH2 <sup>4</sup> |           | 80           | 7         | 7           | 3         | 4            | 1         |
| NV9-NH2 <sup>5</sup>    |           | 10           | 1         | 0.004       | 0.003     | 0.001*       | 0.001     |
| NP4                     | NLVP      | 350          | 60        | 100         | 70        | 50           | 20        |
| NM5                     | NLVPM     | 180          | 30        | 15          | 6         | 11           | 3         |
| NV6                     | NLVPMV    | 380          | 70        | 30          | 10        | 9            | 2         |
| NA7                     | NLVPMVA   | 210          | 40        | 2.0         | 0.7       | 3.6          | 0.5       |
| NT8                     | NLVPMVAT  | 92           | 5         | 30          | 10        | 2.6          | 0.4       |
| LV8                     | LVP MVATV | 17           | 3         | 0.07        | 0.06      | 0.008*       | 0.005     |
| VV7                     | VPMVATV   | 180          | 30        | 15          | 7         | 7.8          | 1.0       |
| PV6                     | PMVATV    | 300          | 200       | 15          | 7         | 15           | 2         |
| MV5                     | MVATV     | 110          | 10        | 3           | 1         | 1.6          | 0.2       |
| VV4                     | VATV      | 270          | 30        | 13          | 4         | 50           | 20        |
| NP4+VV4                 |           |              |           | 90          | 30        |              |           |
| NP4+MV5                 |           |              |           | 11          | 3         |              |           |
| NP4+PV6                 |           |              |           | 130         | 50        |              |           |
| NM5+VV4                 |           |              |           | 50          | 20        |              |           |
| NM5+MV5                 |           |              |           | 9           | 3         |              |           |

| peptide | sequence | $K_{d,high}$      |                 | $K_{d,low}$       |                 | $K_{d,iDSF}$      |                 |
|---------|----------|-------------------|-----------------|-------------------|-----------------|-------------------|-----------------|
|         |          | $K_d/\mu\text{M}$ | $s/\mu\text{M}$ | $K_d/\mu\text{M}$ | $s/\mu\text{M}$ | $K_d/\mu\text{M}$ | $s/\mu\text{M}$ |
| NM5+PV6 |          |                   |                 | 50                | 10              |                   |                 |
| NV6+VV4 |          |                   |                 | 50                | 10              |                   |                 |
| NV6+MV5 |          |                   |                 | 13                | 4               |                   |                 |

**Table S4. Melting temperatures ( $T_m$ ) for dsA2 and different peptides obtained by nDSF.** The  $T_m$  as well as the resulting  $s$  for dsA2 in absence or presence of the different peptides is defined by at least two independent measurements. Protein concentration is 2  $\mu$ M. <sup>1</sup>NV9 – high affinity control, <sup>2</sup>YF9 – low affinity control, <sup>3</sup>GV9 – minimal binding motif, <sup>4</sup>Ac-NV9 – modified *N*-terminus, <sup>5</sup>Ac-NV9 NH2 – modified *N*- and *C*-terminus, <sup>6</sup>NV9-NH2 – modified *C*-terminus.

| peptide                 | 0.2 $\mu$ M          |                    | 2 $\mu$ M            |                    | 20 $\mu$ M           |                    | 1 mM                 |                    | 2 mM                 |                    |
|-------------------------|----------------------|--------------------|----------------------|--------------------|----------------------|--------------------|----------------------|--------------------|----------------------|--------------------|
|                         | $T_m/^\circ\text{C}$ | $s/^\circ\text{C}$ | $T_m/^\circ\text{C}$ | $s/^\circ\text{C}$ | $T_m/^\circ\text{C}$ | $s/^\circ\text{C}$ | $T_m/^\circ\text{C}$ | $s/^\circ\text{C}$ | $T_m/^\circ\text{C}$ | $s/^\circ\text{C}$ |
| empty                   | 35.7                 | 0.6                |                      |                    |                      |                    |                      |                    |                      |                    |
| NV9 <sup>1</sup>        | 35.8                 | 0.8                | 58.96                | 0.07               | 59.1                 | 0.1                | 60.698               | 0.007              |                      |                    |
| YF9 <sup>2</sup>        | 36.1                 | 0.8                | 36.1                 | 0.8                | 36.2                 | 0.8                |                      |                    |                      |                    |
| GV9 <sup>3</sup>        | 36.4                 | 0.6                | 38.8                 | 0.4                | 42.1                 | 0.2                | 47.6                 | 0.1                |                      |                    |
| Ac-NV9 <sup>4</sup>     | 36.6                 | 0.7                | 39.6                 | 0.6                | 43.2                 | 0.6                | 48.420               | 0.001              |                      |                    |
| Ac-NV9-NH2 <sup>5</sup> | 36.0                 | 0.8                | 36.6                 | 0.4                | 38.4                 | 0.3                |                      |                    |                      |                    |
| NV9-NH2 <sup>6</sup>    | 36.0                 | 0.9                | 46.9                 | 0.2                | 50.3                 | 0.3                | 55.53                | 0.04               |                      |                    |
| NP4                     | 35.6                 | 0.4                | 35.7                 | 0.5                | 35.8                 | 0.4                | 38.95                | 0.04               | 42.10                | 0.06               |
| NM5                     | 35.6                 | 0.5                | 35.9                 | 0.4                | 37.3                 | 0.3                | 45.04                | 0.07               | 45.93                | 0.03               |
| NV6                     | 35.5                 | 0.1                | 35.9                 | 0.2                | 37.61                | 0.05               | 44.1                 | 0.6                | 44.6                 | 0.2                |
| NA7                     | 35.51                | 0.09               | 35.9                 | 0.1                | 37.95                | 0.06               | 45.442               | 0.007              |                      |                    |
| NT8                     | 35.5                 | 0.1                | 36.02                | 0.09               | 38.78                | 0.02               | 46.89                | 0.02               |                      |                    |
| LV8                     | 35.40                | 0.08               | 43.5                 | 0.1                | 47.28                | 0.04               | 53.30                | 0.04               |                      |                    |
| VV7                     | 35.5                 | 0.1                | 35.7                 | 0.2                | 37.0                 | 0.1                | 42.29                | 0.01               |                      |                    |
| PV6                     | 35.5                 | 0.2                | 35.62                | 0.09               | 36.40                | 0.02               | 42.2                 | 0.3                | 43.6                 | 0.5                |
| MV5                     | 35.64                | 0.08               | 36.5                 | 0.1                | 39.31                | 0.07               | 47.90                | 0.01               | 49.253               | 0.003              |
| VV4                     | 35.475               | 0.002              | 35.1                 | 0.6                | 35.5                 | 0.2                | 41.47                | 0.03               | 42.6                 | 0.1                |
| NP4+VV4                 |                      |                    |                      |                    |                      |                    | 44.99                | 0.05               | 47.93                | 0.10               |
| NP4+MV5                 |                      |                    |                      |                    |                      |                    | 47.55                | 0.06               | 50.35                | 0.05               |
| NP4+PV6                 |                      |                    |                      |                    |                      |                    | 43.88                | 0.05               | 46.47                | 0.08               |
| NM5+VV4                 |                      |                    |                      |                    |                      |                    | 47.22                | 0.05               | 47.26                | 0.08               |
| NM5+MV5                 |                      |                    |                      |                    |                      |                    | 47.59                | 0.03               | 49.900               | 0.002              |
| NM5+PV6                 |                      |                    |                      |                    |                      |                    | 45.45                | 0.02               | 47.295               | 0.010              |



| peptide | 0.2 $\mu$ M          |                    | 2 $\mu$ M            |                    | 20 $\mu$ M           |                    | 1 mM                 |                    | 2 mM                 |                    |
|---------|----------------------|--------------------|----------------------|--------------------|----------------------|--------------------|----------------------|--------------------|----------------------|--------------------|
|         | $T_m/^\circ\text{C}$ | $s/^\circ\text{C}$ | $T_m/^\circ\text{C}$ | $s/^\circ\text{C}$ | $T_m/^\circ\text{C}$ | $s/^\circ\text{C}$ | $T_m/^\circ\text{C}$ | $s/^\circ\text{C}$ | $T_m/^\circ\text{C}$ | $s/^\circ\text{C}$ |
| NV6+VV4 |                      |                    |                      |                    |                      |                    | 44.14                | 0.05               | 46.3                 | 0.2                |
| NV6+MV5 |                      |                    |                      |                    |                      |                    | 47.36                | 0.04               | 49.84                | 0.02               |
| NV6+PV6 |                      |                    |                      |                    |                      |                    | 44.8                 | 0.1                | 46.6                 | 0.1                |
